# Supplementary material
Source: Elsevier journal article supplement (https://rcastoragev2.blob.core.windows.net/b0223f7e93ec2a95b97b3ae27dbb0bfe/mmc1.pdf)
Supplement: mmc1 [file mmc1.pdf]

# THE LANCET Oncology

## Supplementary appendix

This appendix formed part of the original submission and has been peer reviewed.  
We post it as supplied by the authors.

Supplement to: Atkin W, Wooldrage K, Brenner A, et al. Adenoma surveillance and colorectal cancer incidence: a retrospective, multicentre, cohort study. *Lancet Oncol* 2017; published online April 27. [http://dx.doi.org/10.1016/S1470-2045\(17\)30187-0](http://dx.doi.org/10.1016/S1470-2045(17)30187-0).

## SUPPLEMENTARY MATERIAL

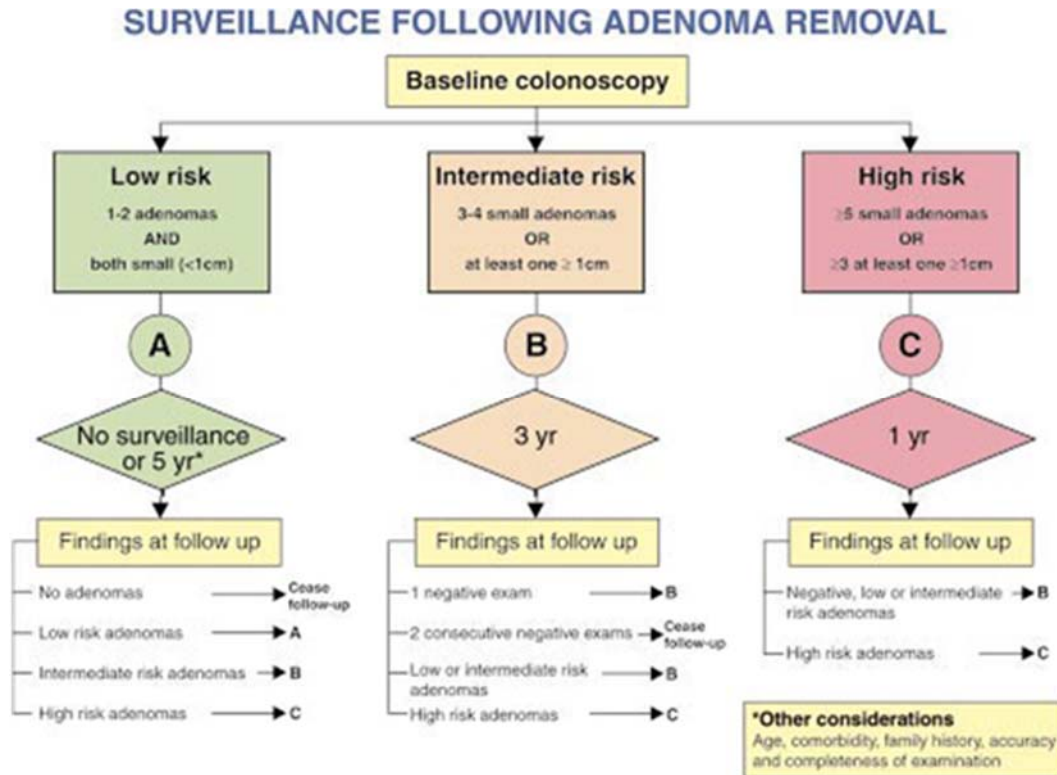

Supplementary Figure 1: UK adenoma surveillance guidelines 2002.<sup>6</sup>

**Supplementary Table 1: Patient inclusion by hospital**

| <b>Trust</b>                                                  | <b>Hospital</b>                                                    | <b>Principal Investigator</b>       | <b>Number of patients included in study</b> |
|---------------------------------------------------------------|--------------------------------------------------------------------|-------------------------------------|---------------------------------------------|
| Greater Glasgow and Clyde NHS Board                           | Glasgow Royal Infirmary                                            | Mr. John Anderson                   | 1,972                                       |
| Royal Liverpool and Broadgreen University Hospitals NHS Trust | Royal Liverpool University Hospital                                | Dr Michael Burkitt/Prof Tony Morris | 1,236                                       |
| Imperial College Healthcare NHS Trust                         | Charing Cross Hospital/<br>Hammersmith Hospital/St Mary's Hospital | Mr Paul Ziprin/ Dr. Geoff Smith     | 1,218                                       |
| London North West Healthcare NHS Trust                        | St Mark's Hospital                                                 | Prof Wendy Atkin                    | 1,148                                       |
| St George's University Hospitals NHS Foundation Trust         | St George's Hospital                                               | Mr. Roger Leicester                 | 1,046                                       |
| Royal Wolverhampton Hospitals NHS Trust                       | New Cross Hospital                                                 | Dr. Andrew Veitch                   | 814                                         |
| North Cumbria University Hospitals NHS Trust                  | Cumberland Infirmary                                               | Dr. Denis Burke                     | 654                                         |
| Royal Surrey County Hospital NHS Trust                        | Royal Surrey County Hospital                                       | Mr. John Stebbing                   | 643                                         |
| Shrewsbury and Telford Hospitals NHS Trust                    | Royal Shrewsbury Hospital                                          | Dr. Mark Smith                      | 608                                         |
| University Hospitals of Leicester NHS Trust                   | Leicester General Hospital                                         | Dr. John de Caestecker              | 566                                         |
| Torbay and South Devon NHS Foundation Trust                   | Torbay District General Hospital                                   | Dr. Mark Feeney                     | 509                                         |
| Yeovil District Hospital NHS Foundation Trust                 | Yeovil District Hospital                                           | Mrs Sue Bulley                      | 431                                         |
| North Tees and Hartlepool Hospitals NHS Foundation Trust      | University Hospital of North Tees                                  | Prof Matt Rutter                    | 426                                         |
| Brighton & Sussex University Hospitals NHS Trust              | Royal Sussex County Hospital                                       | Dr. Stuart Cairns                   | 252                                         |
| Oxleas NHS Foundation Trust                                   | Queen Mary's Hospital, Sidcup                                      | Dr. Howard Curtis/Dr. Guy Sisson    | 241                                         |
| Lewisham and Greenwich NHS Trust                              | Queen Elizabeth Hospital, Woolwich                                 | Dr. Alistair McNair                 | 180                                         |

**Supplementary Table 2: Long-term colorectal cancer incidence by baseline patient, polyp and procedural factors not included in Table 2**

|                                         | n (%)          | Person-years | Colorectal cancer cases | Incidence per 100 000 person-years (95% CI) | Univariable hazard ratio (95% CI) | p value | Multivariable hazard ratio (95% CI) | p value |
|-----------------------------------------|----------------|--------------|-------------------------|---------------------------------------------|-----------------------------------|---------|-------------------------------------|---------|
| Total                                   | 11 994 (100%)  | 101 034      | 210                     | 208 (182-238)                               |                                   |         |                                     |         |
| Family history of cancer                |                |              |                         |                                             |                                   | 0.39    |                                     | 0.57    |
| No                                      | 11 445 (95.8%) | 96 068       | 202                     | 210 (183-241)                               | 1 (Referent)                      |         | 1                                   |         |
| Yes                                     | 499 (4.2%)     | 4 966        | 8                       | 161 (81-322)                                | 0.74 (0.37-1.51)                  |         | 1.24 (0.60-2.54)                    |         |
| Length of baseline visit                |                |              |                         |                                             |                                   | 0.0553  |                                     | 0.1020  |
| 1 day                                   | 6 836 (57.2%)  | 57 943       | 99                      | 171 (140-208)                               | 1                                 |         | 1                                   |         |
| 2-30 days                               | 734 (6.1%)     | 5 601        | 16                      | 286 (175-466)                               | 1.73 (1.02-2.93)                  |         | 1.61 (0.94-2.75)                    |         |
| 1-3 months                              | 1 643 (13.8%)  | 14 068       | 36                      | 256 (185-355)                               | 1.52 (1.04-2.23)                  |         | 1.55 (1.05-2.29)                    |         |
| 3-6 months                              | 1 382 (11.6%)  | 11 953       | 26                      | 218 (148-319)                               | 1.29 (0.84-1.98)                  |         | 1.20 (0.77-1.87)                    |         |
| 6-12 months                             | 1 177 (9.9%)   | 10 123       | 29                      | 286 (199-412)                               | 1.68 (1.11-2.54)                  |         | 1.65 (1.08-2.53)                    |         |
| ≥12 months                              | 172 (1.4%)     | 1 346        | 4                       | 297 (112-792)                               | 1.77 (0.65-4.81)                  |         | 1.60 (0.58-4.44)                    |         |
| Number of hyperplastic polyps           |                |              |                         |                                             |                                   | 0.84    |                                     | 0.86    |
| 0                                       | 9 874 (82.7%)  | 83 523       | 178                     | 213 (184-247)                               | 1                                 |         | 1                                   |         |
| 1                                       | 1 307 (10.9%)  | 11 139       | 21                      | 189 (123-289)                               | 0.90 (0.57-1.41)                  |         | 1.00 (0.63-1.58)                    |         |
| 2                                       | 405 (3.4%)     | 3 345        | 4                       | 120 (45-319)                                | 0.57 (0.21-1.53)                  |         | 0.65 (0.24-1.75)                    |         |
| 3                                       | 152 (1.3%)     | 1 270        | 3                       | 236 (76-732)                                | 1.14 (0.36-3.57)                  |         | 1.33 (0.42-4.17)                    |         |
| 4                                       | 76 (0.6%)      | 653          | 2                       | 306 (77-1224)                               | 1.45 (0.36-5.83)                  |         | 1.99 (0.49-8.08)                    |         |
| ≥5                                      | 130 (1.1%)     | 1 104        | 2                       | 181 (45-724)                                | 0.86 (0.21-3.46)                  |         | 1.17 (0.29-4.73)                    |         |
| Any large hyperplastic polyps?          |                |              |                         |                                             |                                   | 0.89    |                                     | 0.99    |
| No                                      | 11 761 (98.5%) | 99 455       | 207                     | 208 (182-239)                               | 1                                 |         | 1                                   |         |
| Yes                                     | 183 (1.5%)     | 1 579        | 3                       | 190 (61-589)                                | 0.92 (0.29-2.88)                  |         | 0.99 (0.32-3.10)                    |         |
| Number of polyps with unknown histology |                |              |                         |                                             |                                   | 0.36    |                                     | 0.16    |
| 0                                       | 9 322 (78.0%)  | 79 996       | 174                     | 218 (187-252)                               | 1                                 |         | 1                                   |         |
| 1                                       | 1 510 (12.6%)  | 12 171       | 16                      | 131 (81-215)                                | 0.62 (0.37-1.03)                  |         | 0.55 (0.33-0.93)                    |         |
| 2                                       | 517 (4.3%)     | 4 016        | 8                       | 199 (100-398)                               | 0.94 (0.46-1.92)                  |         | 0.86 (0.42-1.77)                    |         |
| 3                                       | 249 (2.1%)     | 2 009        | 5                       | 249 (104-598)                               | 1.15 (0.47-2.81)                  |         | 1.03 (0.42-2.55)                    |         |
| 4                                       | 129 (1.1%)     | 1 053        | 4                       | 380 (143-1012)                              | 1.77 (0.66-4.78)                  |         | 1.85 (0.68-5.04)                    |         |
| ≥5                                      | 217 (1.8%)     | 1 788        | 3                       | 168 (54-520)                                | 0.77 (0.25-2.42)                  |         | 0.63 (0.20-2.01)                    |         |

The reported multivariable hazard ratio and associated p value were for if the variable was added as an additional variable to the final multivariable model presented in Table 2 (the final model included number of surveillance visits, age, adenoma size, adenomas dysplasia, proximal polyps, completeness of colonoscopy and bowel preparation quality).

**Supplementary Table 3: Number of surveillance visits, age and year of entry in the lower- and higher-risk subgroups**

|                                              | n      | Lower-risk<br>subgroup | Higher-risk<br>subgroup† | p value |
|----------------------------------------------|--------|------------------------|--------------------------|---------|
|                                              |        | n (%)                  | n (%)                    |         |
| Total                                        | 11 944 | 3 079 (25.8%)          | 8 865 (74.2)             |         |
| Number of surveillance visits after baseline |        |                        |                          | <0.0001 |
| 0                                            | 5 019  | 1 411 (45.8%)          | 3 608 (40.7%)            |         |
| 1                                            | 3 503  | 937 (30.4%)            | 2 566 (29.0%)            |         |
| 2                                            | 2 085  | 506 (16.4%)            | 1 579 (17.8%)            |         |
| ≥3                                           | 1 337  | 225 (7.3%)             | 1 112 (12.5%)            |         |
| Age at first adenoma detection (years)       |        |                        |                          | <0.0001 |
| <55                                          | 2 122  | 643 (20.9%)            | 1 479 (16.7%)            |         |
| 55-64                                        | 3 179  | 882 (28.6%)            | 2 297 (25.9%)            |         |
| 65-74                                        | 3 957  | 1 001 (32.5%)          | 2 956 (33.3%)            |         |
| ≥75                                          | 2 686  | 553 (18.0%)            | 2 133 (24.1%)            |         |
| Year of entry (start of baseline)            |        |                        |                          | <0.0001 |
| 1984-1994                                    | 439    | 85 (2.8%)              | 354 (4.0%)               |         |
| 1995-1999                                    | 1 430  | 317 (10.3%)            | 1 113 (12.6%)            |         |
| 2000-2004                                    | 4 251  | 942 (30.6%)            | 3 309 (37.3%)            |         |
| 2005-2010                                    | 5 824  | 1 735 (56.3%)          | 4 089 (46.1%)            |         |

P values calculated with  $\chi^2$  test to compare patients in the lower- and higher-risk subgroups.

†The higher-risk subgroup included patients with any of the following risk factors at baseline: sub-optimal quality examination (defined as incomplete colonoscopy, unknown completeness, or poor bowel preparation), high risk polyps (defined as 20mm or larger adenoma or proximal polyps or having high grade dysplasia), or both.
